# Supplementary material for: Relationship between hair cortisol concentrations and cognitive functioning in adolescents with ADHD
Source: PubMed Central journal article supplement — Eur J Psychotraumatol. 2023 Nov 21;14(2):2281752. doi: 10.1080/20008066.2023.2281752 (PMC10990442; doi:10.1080/20008066.2023.2281752), 2023-11-21
Supplement: ZEPT_A_2281752_SM3629.pdf [file ZEPT_A_2281752_SM3629.pdf]

Figure S1. Confirmatory Factor Analysis of the CANTAB tests

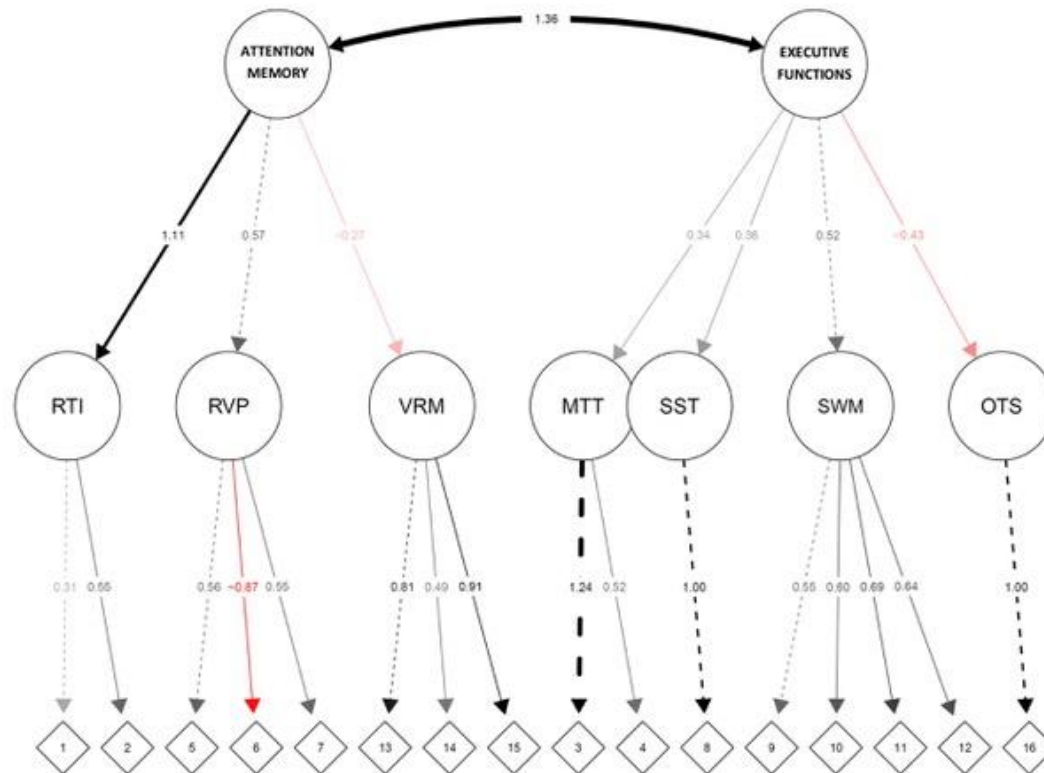

Independent variables (1 to 16) are described in Table S1. Covariances between latent factors are not shown.

Abbreviations: RTI= Reaction Time, RVP=Rapid Visual Information Processing, VRM= Verbal Recognition Memory, MTT= Multitasking Test, SST= Stop Signal Task, SWM= Spatial Working Memory, OTS= One Touch Stockings of Cambridge.

Both latent variables (attention/memory and executive functions) for cognitive tasks indicate worse cognitive performance.
